# Supplementary material for: Adipokines (Leptin, Adiponectin, Resistin) Differentially Regulate All Hormonal Cell Types in Primary Anterior Pituitary Cell Cultures from Two Primate Species
Source: PubMed Central journal article supplement (PMC5640086; doi:10.1038/srep43537), 2017-03-06
Supplement: srep43537-s1.pdf [file srep43537-s1.pdf]

**Title:** Adipokines (Leptin, Adiponectin, Resistin) Differentially Regulate All Hormonal Cell Types in Primary Anterior Pituitary Cell Cultures from Two Primate Species

**Authors:** André Sarmiento-Cabral<sup>1,2,3,4,5</sup>, Juan R. Peinado<sup>6</sup>, Lisa C. Halliday<sup>7</sup>, María M. Malagon<sup>1,2,3,4</sup>, Justo P. Castaño<sup>1,2,3,4,5</sup>, Rhonda D. Kineman<sup>8</sup> and Raúl M. Luque<sup>1,2,3,4,5</sup>

## Supplemental material

Supplemental Table 1. Specific set of primers for amplification of baboon transcripts used for quantitative real-time RT-PCR

| Gene          | Genbank Accession # | Primer Sequence                                                     | Nucleotide Position | Product Size |
|---------------|---------------------|---------------------------------------------------------------------|---------------------|--------------|
| Adiponectin   | EU420013.1          | Sense: ACCAGGAAACCACGACTCAA<br>Antisense: TCCTTTCTCACCTTCTCACC      | Sn 50<br>As 207     | 158          |
| Leptin        | NM_000230.2         | Sense: GTGGCTTTGGCCCTATCTTT<br>Antisense: GGTGACTTTCTGTTTGGAGGAG    | Sn 87<br>As 231     | 145          |
| Resistin      | AF323081.1          | Sense: AAGCTCTCTGTCTCCTCCTCCT<br>Antisense: TCCTCTCATTGATGGCTTCTTC  | Sn 51<br>As 140     | 90           |
| LH            | HQ012663            | Sense: GCCTCCTCTTCCCTCTAAAGACC<br>Antisense: GCGGATTGAGAAGCCTTTATT  | Sn 59<br>As 162     | 104          |
| GH            | DQ340390            | Sense: GACCTAGAGGAAGGCATCCAAA<br>Antisense: AGCAGCCCGTAGTTCTTGAGTAG | Sn 21<br>As 163     | 143          |
| FSH           | HQ012664            | Sense: TTGGTGTGCTGGCTACTGCT<br>Antisense: GGGCACTCTCACTGTTTCGT      | Sn 96<br>As 210     | 115          |
| POMC          | DQ315472            | Sense: CCCTACAGGATGGAGCACTT<br>Antisense: CGTTCTTGATGATGGCGTTT      | Sn 7<br>As 133      | 127          |
| PRL           | EF419886            | Sense: CCTTCGAGACCTGTTTGACC<br>Antisense: ATCTGTTGGGCTTGCTCCTT      | Sn 12<br>As 194     | 183          |
| TSH           | HQ012665            | Sense: ATTGCCTAACCATCAACACCAC<br>Antisense: AAACATCCTGGGACAGAGCATA  | Sn 59<br>As 160     | 102          |
| Kiss1-R       | HQ012666            | Sense: CCAACTTCTACATCGCCAACC<br>Antisense: ACATGAAGTCGCCAGCA        | Sn 29<br>As 142     | 114          |
| GHRH-R        | DQ340391            | Sense: TCACCATCCTGGTTGCTCTC<br>Antisense: GCAGCATCCTTCAGGAACAC      | Sn 74<br>As 185     | 112          |
| GHS-R         | DQ340392            | Sense: GTGTGGGTGTCCAGCATCTT<br>Antisense: CACGGTTTGCTTGTGGTTCT      | Sn 389<br>As 535    | 147          |
| INS-R         | DQ340393            | Sense: ACGCTCTGGTGTCACTTTCCT<br>Antisense: AGCTGCCTTAGGTTCTGGTTG    | Sn 287<br>As 398    | 112          |
| IGF-1R        | DQ340394            | Sense: GAGGAAGTGACGGGGACTAAA<br>Antisense: GTGGTGGTGGAGGTGAAATG     | Sn 139<br>As 251    | 113          |
| PIT-1         | DQ453815            | Sense: TGGAGTGATGGCAGGTAGTTT<br>Antisense: TTACTIONTCCGCTGAGTTCC    | Sn 54<br>As 200     | 147          |
| sst1          | EF639291            | Sense: AGGTAGTAAACCTGGGGGTGTG<br>Antisense: AGCACGTAGCACAGGCAGATAG  | Sn 236<br>As 446    | 211          |
| sst2          | EF639292            | Sense: TGGCATCAATCAGTTCACCA<br>Antisense: TACCAAGCCCCAGATTCACC      | Sn 159<br>As 407    | 249          |
| sst5          | EF639293            | Sense: ACTTCTTCGTGGTCATCCTCT<br>Antisense: AACCTTCTGGAAGCTCTGG      | Sn 49<br>As 146     | 98           |
| DR2           | NM_016574           | Sense: CGAGCATCCTGAACTTGTGTG<br>Antisense: GCGTTATTGAGTCCGAAGAGG    | Sn 594<br>As 765    | 172          |
| CRH-R         | NM_004382           | Sense: TTTTCAACATCGTCCGCATC<br>Antisense: GGGATTGACGAAGAACAGCA      | Sn 1125<br>As 1267  | 143          |
| Cyclophilin A | DQ315473            | Sense: CAAGACGGAGTGGTTGGATG<br>Antisense: TGGTGGTCTTCTTGCTGGTC      | Sn 351<br>As 472    | 122          |
